# Supplementary material for: Indications of magnetic coupling effects in spin cross-over molecular thin films
Source: Royal Society of Chemistry journal article supplement (doi:10.1039/c7cc08246k), 2018-01-01
Supplement: c7cc08246k1.pdf [file c7cc08246k1.pdf]

Supplementary Materials to:

## Indications of magneto-electric effects in spin cross-over molecular thin films

Xin Zhang,<sup>a</sup> Alpha T. N'Diaye,<sup>\*d</sup> Xuanyuan Jiang,<sup>a</sup> Xiaozhe Zhang,<sup>a</sup> Yuewei Yin,<sup>a</sup> Xuegang Chen,<sup>a</sup> Xia Hong,<sup>a</sup> Xiaoshan Xu,<sup>\*a</sup> Peter A. Dowben<sup>\*a</sup>

<sup>a</sup> Department of Physics and Astronomy, University of Nebraska, Lincoln, Nebraska 68588-0299, U.S.A.

<sup>b</sup> Advanced Light Source, Lawrence Berkeley National Laboratory, Berkeley, CA, U.S.A.

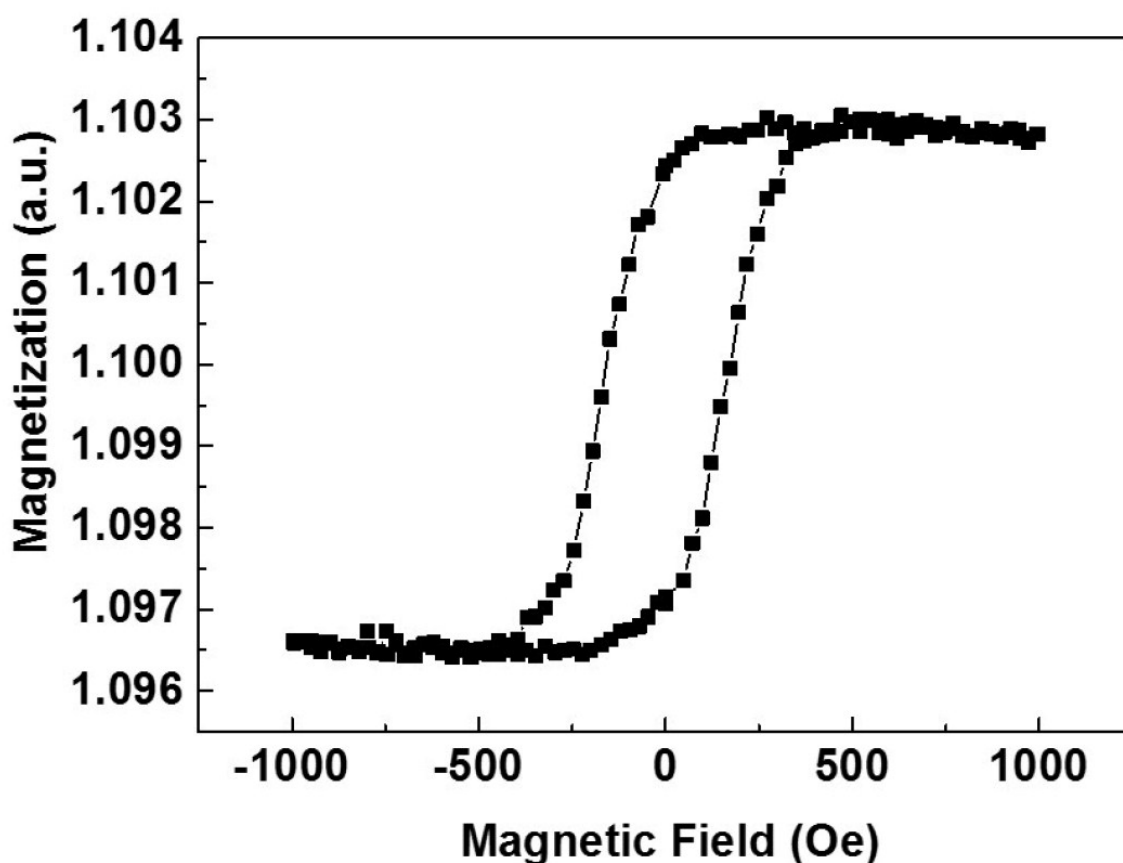

S1. The room temperature magneto-optic derived hysteresis loop of a ~100 nm thin film  $\text{NiCo}_2\text{O}_4$  grown on  $\text{MgAl}_2\text{O}_4$ . The ferromagnetic coercivity is about 200 Oe out of plane.

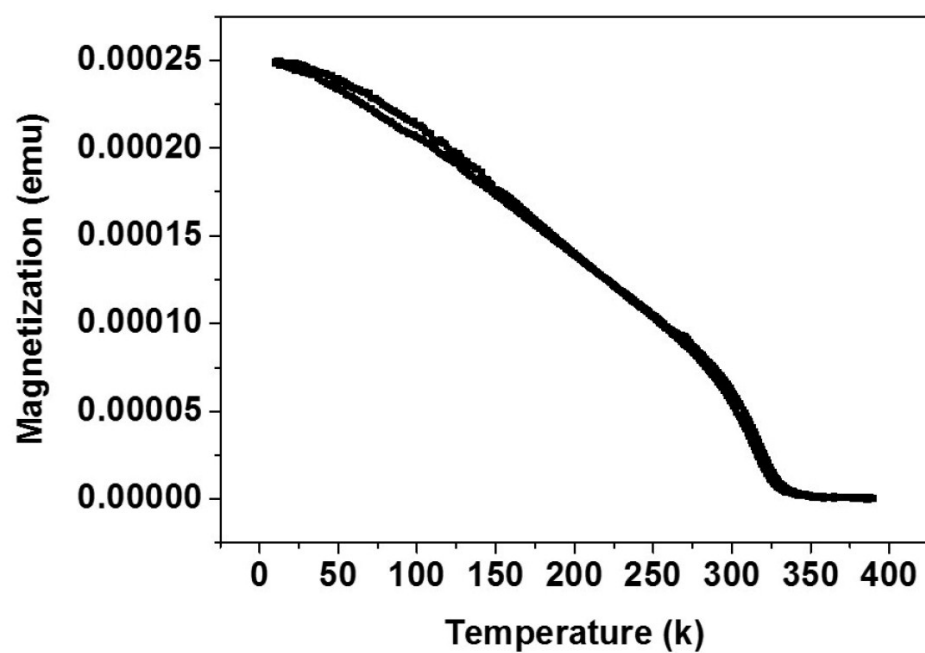

S2. Magnetization *versus* temperature curve of a NiCo<sub>2</sub>O<sub>4</sub> thin film. The Curie temperature is about 325 K.
